# Supplementary material for: Genome-Wide Identification and Analysis of Drought-Responsive Genes and MicroRNAs in Tobacco
Source: MDPI journal article supplement (doi:10.3390/ijms16035714), 2013-03-12
Supplement: s1 [file s1]

## Supplementary Information

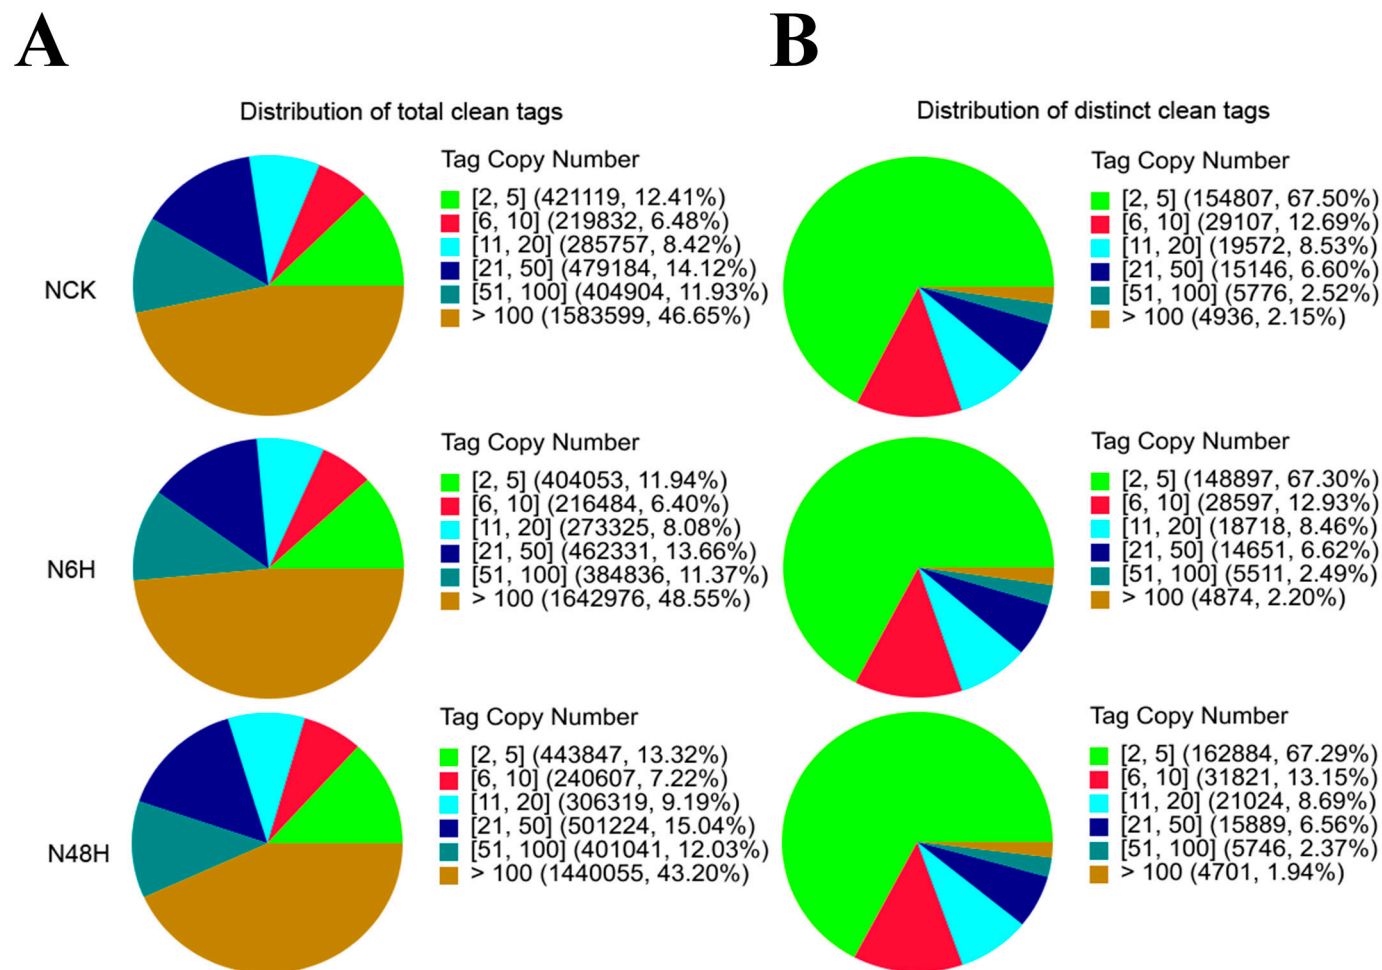

**Figure S1.** Distribution of total (A) and distinct clean tags (B) over different tag-abundance categories in three DGE libraries (NCK, N6H and N48H).

# A

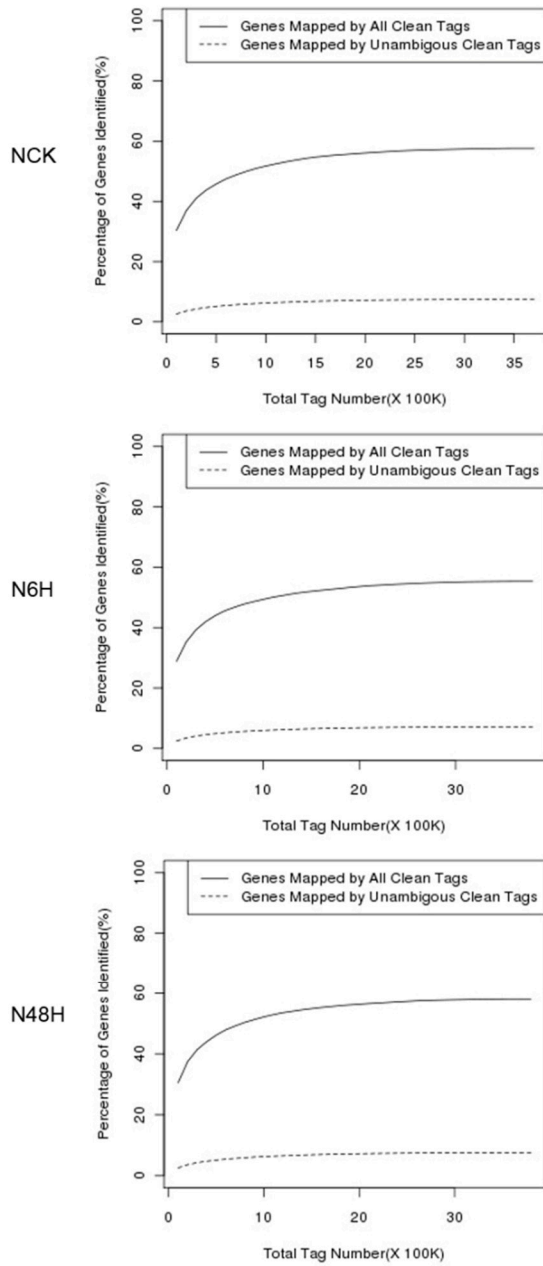

# B

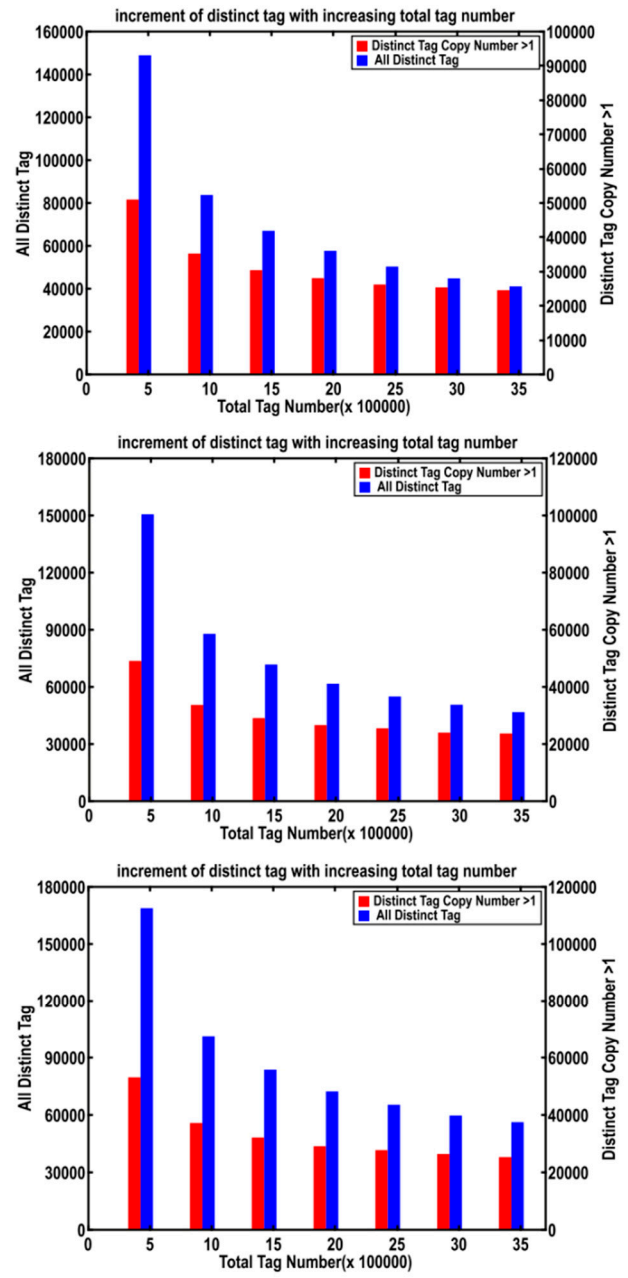

**Figure S2.** Saturation of three DGE libraries (NCK, N6H and N48H).

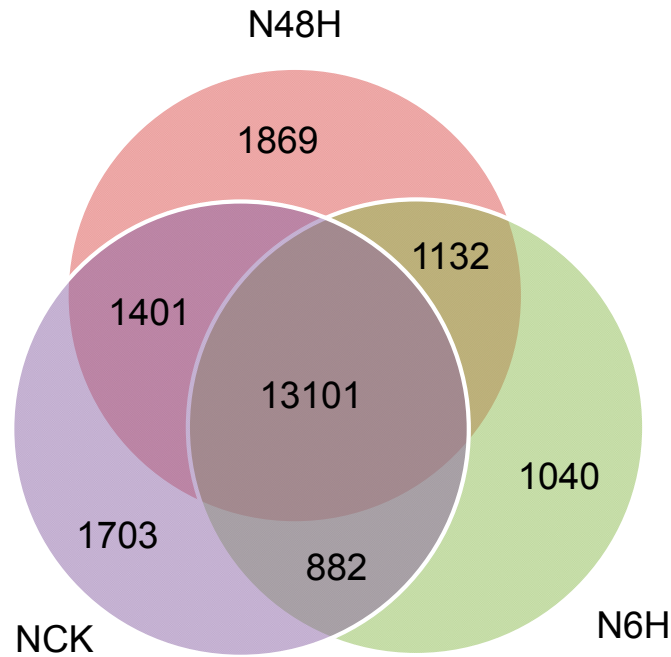

**Figure S3.** Venn diagram of all expressed genes from three DGE libraries (NCK, N6H and N48H).

| Time-course  | 0 h                                                | 6 h               | 48 h                   |
|--------------|----------------------------------------------------|-------------------|------------------------|
|              | G1 group                                           | G2 group          | G3 group               |
| <b>NAC-</b>  | ANAC055 (2)                                        |                   | ANAC055, ANAC072 (4)   |
| <b>MYB-</b>  | CpMYB10, MYB60                                     | MYB- MYB60        | MYB- MYB60 (2)         |
| <b>bZIP-</b> | bZIP1                                              |                   |                        |
| <b>ERF-</b>  | DREB2A (4), DREB3, DREB1B/CBF1, CBF4 (3), WIPK (3) | ERF- CBF4, GmERF3 |                        |
|              | NtERD10C                                           | ABF1              | APX2 FAD3 (2) GRF6 (2) |
|              | RD29A and RD29B                                    | NCED1             | HSFA2 NtERD10B (3)     |
|              | GRF6 ZPT2-1                                        | GRF6              | SRK2E/OST1/SnRK2.6 (2) |
|              |                                                    |                   | PP2Ac-1 (2) RD22       |

**Figure S4.** Differentially expressed drought responsive genes (DRGs) showing expression gradients along time-course. The number in bracket represents the number of genes which have the similar function as adjacent gene experimentally validated in other plants. Abbreviations: ABF, ABRE-binding factor; AREB, ABA-responsive-element-binding protein; ERF, ethylene-responsive-element-binding factor; DRE, dehydration-responsive element; DREB, DRE-binding factor. CBF4, DREB1B, DREB2A, DREB3, *GmERF3* and WIPK are the members of ERF family; APX, L-ascorbate peroxidase; bZIP, basic-domain leucine-zipper; GRF, growth-regulating factor; FAD, fatty acid desaturation; HSFA, class A of heat shock transcription factor; *NCED*, 9-cis-epoxycarotenoid dioxygenase gene; SnRK2.6, SNF1-related protein kinase2.6/OST1 kinase; NAC, NAM, ATAF, and CUC transcription factor; PP2Ac-1, catalytic subunit (c) of protein phosphatase 2A; ZPT, Renamed from EPF, Cys2/His2-type zinc finger protein.

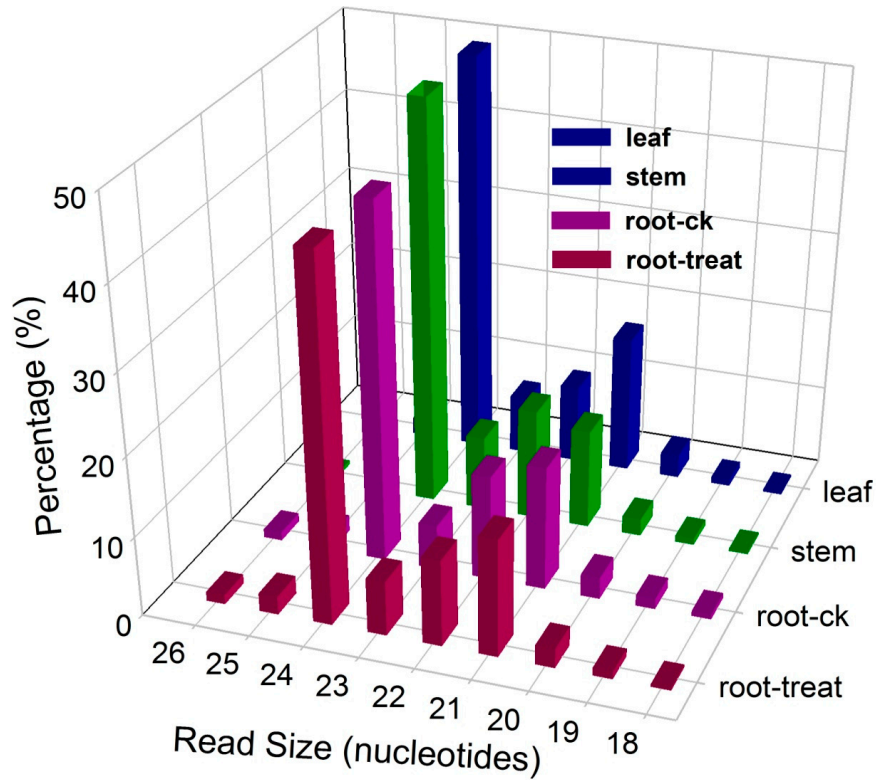

**Figure S5.** Length distribution of small RNAs from different tissues (roots, stems and leaves) under the same normal conditions and drought-treated roots.

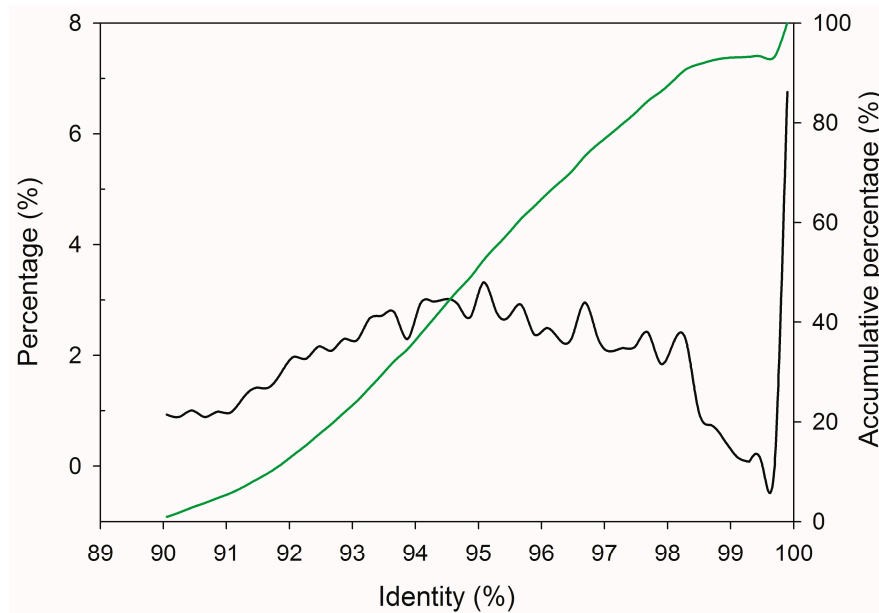

**Figure S6.** The identity of ESTs sequence from *Nicotiana tabacum* L. and the genome database from *Nicotiana benthamiana*. The black curve line is the percentage of ESTs with identity >90%, while the green curve line is accumulative percentage of ESTs with identity >90%.
